# Supplementary material
Source: MDPI journal article supplement (https://www.mdpi.com/2076-3417/14/5/2053)
Supplement: s1 [file s1]

Combined pre-treatment technologies for cleaning biogas before its upgrading to biomethane: an Italian full-scale anaerobic digester case study

#### Supplementary materials

**Table S1:** analytical details (pg. 2 – 4)

**Table S2:** bio-CH<sub>4</sub> specification (pg. 5)

**Table S1:** analytical details

| #  |                        | analyzed compound       | CAS number                  | formula                           | unit               | method              | LOQ <sup>a</sup> |
|----|------------------------|-------------------------|-----------------------------|-----------------------------------|--------------------|---------------------|------------------|
| 1  |                        | methane                 | 74-82-8                     | CH <sub>4</sub>                   | %                  | on-line measurement | 0.01             |
| 2  |                        | carbon dioxide          | 124-38-9                    | CO <sub>2</sub>                   | %                  | on-line measurement | 0.01             |
| 3  |                        | oxygen                  | 7782-44-7                   | O <sub>2</sub>                    | %                  | on-line measurement | 0.01             |
| 4  |                        | hydrogen sulfide        | 7783-06-4                   | H <sub>2</sub> S                  | ppmv               | on-line measurement | 1                |
| 5  | terpenes               | limonene                | 5989-27-5                   | C <sub>10</sub> H <sub>16</sub>   | mg/Nm <sup>3</sup> | UNI CEN/TS 13649    | 0.1              |
| 6  |                        | α-pinene                | 80-56-8                     | C <sub>10</sub> H <sub>16</sub>   | mg/Nm <sup>3</sup> | UNI CEN/TS 13649    | 0.1              |
| 7  |                        | β-pinene                | 127-91-3                    | C <sub>10</sub> H <sub>16</sub>   | mg/Nm <sup>3</sup> | UNI CEN/TS 13649    | 0.1              |
| 8  |                        | p-cymene                | 99-87-6                     | C <sub>10</sub> H <sub>14</sub>   | mg/Nm <sup>3</sup> | UNI CEN/TS 13649    | 0.1              |
| 9  |                        | m-cymene                | 535-77-3                    | C <sub>10</sub> H <sub>14</sub>   | mg/Nm <sup>3</sup> | UNI CEN/TS 13649    | 0.1              |
| 10 |                        | camphene                | 79-92-5                     | C <sub>10</sub> H <sub>16</sub>   | mg/Nm <sup>3</sup> | UNI CEN/TS 13649    | 0.1              |
| 11 |                        | myrcene                 | 123-35-3                    | C <sub>10</sub> H <sub>16</sub>   | mg/Nm <sup>3</sup> | UNI CEN/TS 13649    | 0.1              |
| 12 |                        | phellandrene *          | 99-83-2, 555-10-2           | C <sub>10</sub> H <sub>16</sub>   | mg/Nm <sup>3</sup> | UNI CEN/TS 13649    | 0.1              |
| 13 |                        | Δ-3-carene              | 13466-78-9                  | C <sub>10</sub> H <sub>16</sub>   | mg/Nm <sup>3</sup> | UNI CEN/TS 13649    | 0.1              |
| 14 |                        | terpinene *             | 99-86-5, 99-84-3, 99-85-4   | C <sub>10</sub> H <sub>16</sub>   | mg/Nm <sup>3</sup> | UNI CEN/TS 13649    | 0.1              |
| 15 |                        | camphor                 | 76-22-2                     | C <sub>10</sub> H <sub>16</sub> O | mg/Nm <sup>3</sup> | UNI CEN/TS 13649    | 0.1              |
| 16 |                        | menthol *               | 2216-51-5, 89-78-1          | C <sub>10</sub> H <sub>20</sub> O | mg/Nm <sup>3</sup> | UNI CEN/TS 13649    | 0.1              |
| 17 | aliphatic hydrocarbons | propane                 | 74-98-6                     | C <sub>3</sub> H <sub>8</sub>     | mg/Nm <sup>3</sup> | UNI CEN/TS 13649    | 0.1              |
| 18 |                        | butane                  | 106-97-8                    | C <sub>4</sub> H <sub>10</sub>    | mg/Nm <sup>3</sup> | UNI CEN/TS 13649    | 0.1              |
| 19 |                        | pentane                 | 109-66-0                    | C <sub>5</sub> H <sub>12</sub>    | mg/Nm <sup>3</sup> | UNI CEN/TS 13649    | 0.1              |
| 20 |                        | hexane                  | 110-54-3                    | C <sub>6</sub> H <sub>14</sub>    | mg/Nm <sup>3</sup> | UNI CEN/TS 13649    | 0.1              |
| 21 |                        | heptane                 | 142-82-5                    | C <sub>7</sub> H <sub>16</sub>    | mg/Nm <sup>3</sup> | UNI CEN/TS 13649    | 0.1              |
| 22 |                        | octane                  | 111-65-9                    | C <sub>8</sub> H <sub>18</sub>    | mg/Nm <sup>3</sup> | UNI CEN/TS 13649    | 0.1              |
| 23 |                        | decane                  | 124-18-5                    | C <sub>10</sub> H <sub>22</sub>   | mg/Nm <sup>3</sup> | UNI CEN/TS 13649    | 0.1              |
| 24 |                        | cyclopentane            | 287-92-3                    | C <sub>5</sub> H <sub>10</sub>    | mg/Nm <sup>3</sup> | UNI CEN/TS 13649    | 0.1              |
| 25 |                        | 2-methylpentane         | 107-83-5                    | C <sub>6</sub> H <sub>14</sub>    | mg/Nm <sup>3</sup> | UNI CEN/TS 13649    | 0.1              |
| 26 |                        | cyclohexane             | 110-82-7                    | C <sub>6</sub> H <sub>12</sub>    | mg/Nm <sup>3</sup> | UNI CEN/TS 13649    | 0.1              |
| 27 |                        | methylcyclohexane       | 108-87-2                    | C <sub>7</sub> H <sub>14</sub>    | mg/Nm <sup>3</sup> | UNI CEN/TS 13649    | 0.1              |
| 28 |                        | isoprene                | 78-79-5                     | C <sub>5</sub> H <sub>8</sub>     | mg/Nm <sup>3</sup> | UNI CEN/TS 13649    | 0.1              |
| 29 | aromatic hydrocarbons  | benzene                 | 71-43-2                     | C <sub>6</sub> H <sub>6</sub>     | mg/Nm <sup>3</sup> | UNI CEN/TS 13649    | 0.1              |
| 30 |                        | toluene                 | 108-88-3                    | C <sub>7</sub> H <sub>8</sub>     | mg/Nm <sup>3</sup> | UNI CEN/TS 13649    | 0.1              |
| 31 |                        | ethyl-benzene           | 100-41-4                    | C <sub>8</sub> H <sub>10</sub>    | mg/Nm <sup>3</sup> | UNI CEN/TS 13649    | 0.1              |
| 32 |                        | xylene *                | 1330-20-7                   | C <sub>8</sub> H <sub>10</sub>    | mg/Nm <sup>3</sup> | UNI CEN/TS 13649    | 0.1              |
| 33 |                        | styrene                 | 100-42-5                    | C <sub>8</sub> H <sub>8</sub>     | mg/Nm <sup>3</sup> | UNI CEN/TS 13649    | 0.1              |
| 34 |                        | 4-vinyltoluene          | 622-97-9                    | C <sub>9</sub> H <sub>10</sub>    | mg/Nm <sup>3</sup> | UNI CEN/TS 13649    | 0.1              |
| 35 |                        | trimethyl-benzene *     | 108-67-8, 526-73-8, 95-63-6 | C <sub>9</sub> H <sub>12</sub>    | mg/Nm <sup>3</sup> | UNI CEN/TS 13649    | 0.1              |
| 36 |                        | tetramethyl-benzene *   | 488-23-3, 95-93-2, 527-53-7 | C <sub>10</sub> H <sub>14</sub>   | mg/Nm <sup>3</sup> | UNI CEN/TS 13649    | 0.1              |
| 37 | ketones                | cumene                  | 98-82-8                     | C <sub>9</sub> H <sub>12</sub>    | mg/Nm <sup>3</sup> | UNI CEN/TS 13649    | 0.1              |
| 38 |                        | acetone                 | 67-64-1                     | C <sub>3</sub> H <sub>6</sub> O   | mg/Nm <sup>3</sup> | UNI CEN/TS 13649    | 0.1              |
| 39 |                        | methyl ethyl ketone     | 78-93-3                     | C <sub>4</sub> H <sub>8</sub> O   | mg/Nm <sup>3</sup> | UNI CEN/TS 13649    | 0.1              |
| 40 |                        | methyl propyl ketone    | 107-87-9                    | C <sub>5</sub> H <sub>10</sub> O  | mg/Nm <sup>3</sup> | UNI CEN/TS 13649    | 0.1              |
| 41 |                        | methyl isopropyl ketone | 563-80-4                    | C <sub>5</sub> H <sub>10</sub> O  | mg/Nm <sup>3</sup> | UNI CEN/TS 13649    | 0.1              |
| 42 |                        | methyl butyl ketone     | 591-78-6                    | C <sub>6</sub> H <sub>12</sub> O  | mg/Nm <sup>3</sup> | UNI CEN/TS 13649    | 0.1              |
| 43 |                        | cyclohexanone           | 108-94-1                    | C <sub>6</sub> H <sub>10</sub> O  | mg/Nm <sup>3</sup> | UNI CEN/TS 13649    | 0.1              |

|    |                      |                        |                              |                                                             |                    |                  |     |
|----|----------------------|------------------------|------------------------------|-------------------------------------------------------------|--------------------|------------------|-----|
| 44 | halocarbon compounds | chloromethane          | 74-87-3                      | CH <sub>3</sub> Cl                                          | mg/Nm <sup>3</sup> | UNI CEN/TS 13649 | 0.1 |
| 45 |                      | vinyl chloride         | 75-01-4                      | C <sub>2</sub> H <sub>3</sub> Cl                            | mg/Nm <sup>3</sup> | UNI CEN/TS 13649 | 0.1 |
| 46 |                      | chloroethane           | 75-00-3                      | C <sub>2</sub> H <sub>5</sub> Cl                            | mg/Nm <sup>3</sup> | UNI CEN/TS 13649 | 0.1 |
| 47 |                      | dichloromethane        | 75-09-2                      | CH <sub>2</sub> Cl <sub>2</sub>                             | mg/Nm <sup>3</sup> | UNI CEN/TS 13649 | 0.1 |
| 48 |                      | dichloroethane *       | 75-34-3, 107-06-2            | C <sub>2</sub> H <sub>4</sub> Cl <sub>2</sub>               | mg/Nm <sup>3</sup> | UNI CEN/TS 13649 | 0.1 |
| 49 |                      | dichloroethylene *     | 75-35-4, 540-59-0            | C <sub>2</sub> H <sub>2</sub> Cl <sub>2</sub>               | mg/Nm <sup>3</sup> | UNI CEN/TS 13649 | 0.1 |
| 50 |                      | dichloropropane *      | 78-87-5, 142-28-9, 594-20-7  | C <sub>3</sub> H <sub>6</sub> Cl <sub>2</sub>               | mg/Nm <sup>3</sup> | UNI CEN/TS 13649 | 0.1 |
| 51 |                      | 1,3-dichloropropene    | 542-75-6                     | C <sub>3</sub> H <sub>4</sub> Cl <sub>2</sub>               | mg/Nm <sup>3</sup> | UNI CEN/TS 13649 | 0.1 |
| 52 |                      | dichlorobenzene *      | 95-50-1, 541-73-1, 106-46-7  | C <sub>6</sub> H <sub>4</sub> Cl <sub>2</sub>               | mg/Nm <sup>3</sup> | UNI CEN/TS 13649 | 0.1 |
| 53 |                      | chloroform             | 67-66-3                      | CHCl <sub>3</sub>                                           | mg/Nm <sup>3</sup> | UNI CEN/TS 13649 | 0.1 |
| 54 |                      | trichloroethane *      | 71-55-6, 79-00-5             | C <sub>2</sub> H <sub>3</sub> Cl <sub>3</sub>               | mg/Nm <sup>3</sup> | UNI CEN/TS 13649 | 0.1 |
| 55 |                      | trichloropropane       | 96-18-4                      | C <sub>3</sub> H <sub>5</sub> Cl <sub>3</sub>               | mg/Nm <sup>3</sup> | UNI CEN/TS 13649 | 0.1 |
| 56 |                      | trichloroethylene      | 79-01-6                      | C <sub>2</sub> HCl <sub>3</sub>                             | mg/Nm <sup>3</sup> | UNI CEN/TS 13649 | 0.1 |
| 57 |                      | tetrachloroethylene    | 127-18-4                     | C <sub>2</sub> Cl <sub>4</sub>                              | mg/Nm <sup>3</sup> | UNI CEN/TS 13649 | 0.1 |
| 58 |                      | tetrachloroethane *    | 630-20-6, 79-34-5            | C <sub>2</sub> H <sub>2</sub> Cl <sub>4</sub>               | mg/Nm <sup>3</sup> | UNI CEN/TS 13649 | 0.1 |
| 59 |                      | carbon tetrachloride   | 56-23-5                      | CCl <sub>4</sub>                                            | mg/Nm <sup>3</sup> | UNI CEN/TS 13649 | 0.1 |
| 60 |                      | pentachloroethane      | 76-01-7                      | C <sub>2</sub> HCl <sub>5</sub>                             | mg/Nm <sup>3</sup> | UNI CEN/TS 13649 | 0.1 |
| 61 |                      | hexachloroethane       | 67-72-1                      | C <sub>2</sub> Cl <sub>6</sub>                              | mg/Nm <sup>3</sup> | UNI CEN/TS 13649 | 0.1 |
| 62 |                      | tribromomethane        | 75-25-2                      | CHBr <sub>3</sub>                                           | mg/Nm <sup>3</sup> | UNI CEN/TS 13649 | 0.1 |
| 63 |                      | dibromoethane *        | 557-91-5, 106-93-4           | C <sub>2</sub> H <sub>4</sub> Br <sub>2</sub>               | mg/Nm <sup>3</sup> | UNI CEN/TS 13649 | 0.1 |
| 64 | esters               | bromodichloromethane   | 75-27-4                      | CHBrCl <sub>2</sub>                                         | mg/Nm <sup>3</sup> | UNI CEN/TS 13649 | 0.1 |
| 65 |                      | dibromochloromethane   | 124-48-1                     | CHBr <sub>2</sub> Cl                                        | mg/Nm <sup>3</sup> | UNI CEN/TS 13649 | 0.1 |
| 66 |                      | ethyl acetate          | 141-78-6                     | C <sub>4</sub> H <sub>8</sub> O <sub>2</sub>                | mg/Nm <sup>3</sup> | UNI CEN/TS 13649 | 0.1 |
| 67 |                      | methyl acetate         | 79-20-9                      | C <sub>3</sub> H <sub>6</sub> O <sub>2</sub>                | mg/Nm <sup>3</sup> | UNI CEN/TS 13649 | 0.1 |
| 68 |                      | butyl acetate          | 123-86-4                     | C <sub>6</sub> H <sub>12</sub> O <sub>2</sub>               | mg/Nm <sup>3</sup> | UNI CEN/TS 13649 | 0.1 |
| 69 |                      | methyl propionate      | 554-12-1                     | C <sub>4</sub> H <sub>8</sub> O <sub>2</sub>                | mg/Nm <sup>3</sup> | UNI CEN/TS 13649 | 0.1 |
| 70 |                      | ethyl propionate       | 105-37-3                     | C <sub>5</sub> H <sub>10</sub> O <sub>2</sub>               | mg/Nm <sup>3</sup> | UNI CEN/TS 13649 | 0.1 |
| 71 |                      | methyl butanoate       | 623-42-7                     | C <sub>5</sub> H <sub>10</sub> O <sub>2</sub>               | mg/Nm <sup>3</sup> | UNI CEN/TS 13649 | 0.1 |
| 72 |                      | ethyl butanoate        | 105-54-4                     | C <sub>6</sub> H <sub>12</sub> O <sub>2</sub>               | mg/Nm <sup>3</sup> | UNI CEN/TS 13649 | 0.1 |
| 73 |                      | methyl pentanoate      | 624-24-8                     | C <sub>6</sub> H <sub>12</sub> O <sub>2</sub>               | mg/Nm <sup>3</sup> | UNI CEN/TS 13649 | 0.1 |
| 74 |                      | ethyl pentanoate       | 539-82-2                     | C <sub>7</sub> H <sub>14</sub> O <sub>2</sub>               | mg/Nm <sup>3</sup> | UNI CEN/TS 13649 | 0.1 |
| 75 |                      | ethyl isovalerate      | 108-64-5                     | C <sub>7</sub> H <sub>14</sub> O <sub>2</sub>               | mg/Nm <sup>3</sup> | UNI CEN/TS 13649 | 0.1 |
| 76 |                      | 2-methoxyethyl acetate | 110-49-6                     | C <sub>5</sub> H <sub>10</sub> O <sub>3</sub>               | mg/Nm <sup>3</sup> | UNI CEN/TS 13649 | 0.1 |
| 77 |                      | acetonitrile           | 75-05-8                      | C <sub>2</sub> H <sub>3</sub> N                             | mg/Nm <sup>3</sup> | UNI CEN/TS 13649 | 0.1 |
| 78 | alcohols             | methanol               | 67-56-1                      | CH <sub>4</sub> O                                           | mg/Nm <sup>3</sup> | UNI CEN/TS 13649 | 0.1 |
| 79 |                      | ethanol                | 64-17-5                      | C <sub>2</sub> H <sub>6</sub> O                             | mg/Nm <sup>3</sup> | UNI CEN/TS 13649 | 0.1 |
| 80 |                      | propanol *             | 71-23-8, 67-63-0             | C <sub>3</sub> H <sub>8</sub> O                             | mg/Nm <sup>3</sup> | UNI CEN/TS 13649 | 0.1 |
| 81 |                      | buthanol *             | 71-36-3, 75-65-0, 78-83-1    | C <sub>4</sub> H <sub>10</sub> O                            | mg/Nm <sup>3</sup> | UNI CEN/TS 13649 | 0.1 |
| 82 |                      | pentanol *             | 71-41-0, 6032-29-7, 584-02-1 | C <sub>5</sub> H <sub>12</sub> O                            | mg/Nm <sup>3</sup> | UNI CEN/TS 13649 | 0.1 |
| 83 |                      | 2-methoxyethanol       | 109-86-4                     | C <sub>3</sub> H <sub>8</sub> O <sub>2</sub>                | mg/Nm <sup>3</sup> | UNI CEN/TS 13649 | 0.1 |
| 84 | nitro compounds      | nitromethane           | 75-52-5                      | CH <sub>3</sub> NO <sub>2</sub>                             | mg/Nm <sup>3</sup> | UNI CEN/TS 13649 | 0.1 |
| 85 |                      | nitroethane            | 79-24-3                      | C <sub>2</sub> H <sub>5</sub> NO <sub>2</sub>               | mg/Nm <sup>3</sup> | UNI CEN/TS 13649 | 0.1 |
| 86 |                      | nitropropane *         | 108-03-2, 79-46-9            | C <sub>3</sub> H <sub>7</sub> NO <sub>2</sub>               | mg/Nm <sup>3</sup> | UNI CEN/TS 13649 | 0.1 |
| 87 |                      | nitrobenzene           | 98-95-3                      | C <sub>6</sub> H <sub>5</sub> NO <sub>2</sub>               | mg/Nm <sup>3</sup> | UNI CEN/TS 13649 | 0.1 |
| 88 |                      | dinitrobenzene *       | 25154-54-5                   | C <sub>6</sub> H <sub>4</sub> N <sub>2</sub> O <sub>4</sub> | mg/Nm <sup>3</sup> | UNI CEN/TS 13649 | 0.1 |

|     |                  |                               |                       |                                                                |                    |                                  |       |
|-----|------------------|-------------------------------|-----------------------|----------------------------------------------------------------|--------------------|----------------------------------|-------|
| 89  | ethers           | tetrahydrofuran               | 109-99-9              | C <sub>4</sub> H <sub>8</sub> O                                | mg/Nm <sup>3</sup> | UNI CEN/TS 13649                 | 0.1   |
| 90  |                  | 1,4-dioxane                   | 123-91-1              | C <sub>4</sub> H <sub>8</sub> O <sub>2</sub>                   | mg/Nm <sup>3</sup> | UNI CEN/TS 13649                 | 0.1   |
| 91  |                  | dimethyl ether                | 115-10-6              | C <sub>2</sub> H <sub>6</sub> O                                | mg/Nm <sup>3</sup> | UNI CEN/TS 13649                 | 0.1   |
| 92  |                  | diethyl ether                 | 60-29-7               | C <sub>4</sub> H <sub>10</sub> O                               | mg/Nm <sup>3</sup> | UNI CEN/TS 13649                 | 0.1   |
| 93  |                  | methylfuran *                 | 534-22-5, 930-27-8    | C <sub>5</sub> H <sub>6</sub> O                                | mg/Nm <sup>3</sup> | UNI CEN/TS 13649                 | 0.1   |
| 94  |                  | ethylfuran *                  | 3208-16-0, 67363-95-5 | C <sub>6</sub> H <sub>8</sub> O                                | mg/Nm <sup>3</sup> | UNI CEN/TS 13649                 | 0.1   |
| 95  |                  | dimethylfuran *               | 625-86-5, 3710-43-8   | C <sub>6</sub> H <sub>8</sub> O                                | mg/Nm <sup>3</sup> | UNI CEN/TS 13649                 | 0.1   |
| 96  |                  | methyl tert-butyl ether       | 1634-04-4             | C <sub>5</sub> H <sub>12</sub> O                               | mg/Nm <sup>3</sup> | UNI CEN/TS 13649                 | 0.1   |
| 97  | siloxanes        | hexamethylcyclotrisiloxane    | 541-05-9              | ((CH <sub>3</sub> ) <sub>2</sub> SiO) <sub>3</sub>             | mg/Nm <sup>3</sup> | UNI CEN/TS 13649                 | 0.1   |
| 98  |                  | octamethylcyclotetrasiloxane  | 556-67-2              | ((CH <sub>3</sub> ) <sub>2</sub> SiO) <sub>4</sub>             | mg/Nm <sup>3</sup> | UNI CEN/TS 13649                 | 0.1   |
| 99  |                  | decamethylcyclopentasiloxane  | 541-02-6              | ((CH <sub>3</sub> ) <sub>2</sub> SiO) <sub>5</sub>             | mg/Nm <sup>3</sup> | UNI CEN/TS 13649                 | 0.1   |
| 100 |                  | dodecamethylcyclohexasiloxane | 540-97-6              | ((CH <sub>3</sub> ) <sub>2</sub> SiO) <sub>6</sub>             | mg/Nm <sup>3</sup> | UNI CEN/TS 13649                 | 0.1   |
| 101 |                  | pentamethyldisiloxane         | 1438-82-0             | C <sub>5</sub> H <sub>16</sub> Si <sub>2</sub> O               | mg/Nm <sup>3</sup> | UNI CEN/TS 13649                 | 0.1   |
| 102 |                  | hexamethyldisiloxane          | 107-46-0              | C <sub>6</sub> H <sub>18</sub> Si <sub>2</sub> O               | mg/Nm <sup>3</sup> | UNI CEN/TS 13649                 | 0.1   |
| 103 |                  | octamethyltrisiloxane         | 107-51-7              | C <sub>8</sub> H <sub>24</sub> Si <sub>3</sub> O <sub>2</sub>  | mg/Nm <sup>3</sup> | UNI CEN/TS 13649                 | 0.1   |
| 104 |                  | decamethyltetrasiloxane       | 141-62-8              | C <sub>10</sub> H <sub>30</sub> Si <sub>4</sub> O <sub>3</sub> | mg/Nm <sup>3</sup> | UNI CEN/TS 13649                 | 0.1   |
| 105 |                  | dodecamethylpentasiloxane     | 141-63-9              | C <sub>12</sub> H <sub>36</sub> Si <sub>5</sub> O <sub>4</sub> | mg/Nm <sup>3</sup> | UNI CEN/TS 13649                 | 0.1   |
| 106 | aldehydes        | acetaldehyde                  | 75-07-0               | C <sub>2</sub> H <sub>4</sub> O                                | mg/Nm <sup>3</sup> | UNI CEN/TS 13649                 | 0.1   |
| 107 |                  | propanal                      | 123-38-6              | C <sub>3</sub> H <sub>6</sub> O                                | mg/Nm <sup>3</sup> | UNI CEN/TS 13649                 | 0.1   |
| 108 |                  | butanal                       | 123-78-8              | C <sub>4</sub> H <sub>8</sub> O                                | mg/Nm <sup>3</sup> | UNI CEN/TS 13649                 | 0.1   |
| 109 |                  | pentanal                      | 110-62-3              | C <sub>5</sub> H <sub>10</sub> O                               | mg/Nm <sup>3</sup> | UNI CEN/TS 13649                 | 0.1   |
| 110 |                  | hexanal                       | 66-25-1               | C <sub>6</sub> H <sub>12</sub> O                               | mg/Nm <sup>3</sup> | UNI CEN/TS 13649                 | 0.1   |
| 111 |                  | heptanal                      | 111-71-7              | C <sub>7</sub> H <sub>14</sub> O                               | mg/Nm <sup>3</sup> | UNI CEN/TS 13649                 | 0.1   |
| 112 |                  | octanal                       | 124-13-0              | C <sub>8</sub> H <sub>16</sub> O                               | mg/Nm <sup>3</sup> | UNI CEN/TS 13649                 | 0.1   |
| 113 |                  | benzaldehyde                  | 100-52-7              | C <sub>7</sub> H <sub>6</sub> O                                | mg/Nm <sup>3</sup> | UNI CEN/TS 13649                 | 0.1   |
| 114 | sulfur compounds | dimethyl sulfide              | 75-18-3               | C <sub>2</sub> H <sub>6</sub> S                                | mg/Nm <sup>3</sup> | UNI CEN/TS 13649                 | 0.1   |
| 115 |                  | dimethyl trisulfide           | 3658-80-8             | C <sub>2</sub> H <sub>6</sub> S <sub>3</sub>                   | mg/Nm <sup>3</sup> | UNI CEN/TS 13649                 | 0.1   |
| 116 |                  | dimethyl tetrasulfide         | 5756-24-1             | C <sub>2</sub> H <sub>6</sub> S <sub>3</sub>                   | mg/Nm <sup>3</sup> | UNI CEN/TS 13649                 | 0.1   |
| 117 |                  | carbon disulfide              | 75-15-0               | CS <sub>2</sub>                                                | mg/Nm <sup>3</sup> | UNI CEN/TS 13649                 | 0.1   |
| 118 |                  | methanethiol                  | 74-93-1               | CH <sub>4</sub> S                                              | mg/Nm <sup>3</sup> | UNI CEN/TS 13649                 | 0.1   |
| 119 |                  | ethanethiol                   | 75-08-1               | C <sub>2</sub> H <sub>6</sub> S                                | mg/Nm <sup>3</sup> | UNI CEN/TS 13649                 | 0.1   |
| 120 |                  | propanethiol                  | 107-3-9               | C <sub>3</sub> H <sub>8</sub> S                                | mg/Nm <sup>3</sup> | UNI CEN/TS 13649                 | 0.1   |
| 121 |                  | buthanethiol *                | 109-79-5, 75-66-1     | C <sub>4</sub> H <sub>10</sub> S                               | mg/Nm <sup>3</sup> | UNI CEN/TS 13649                 | 0.1   |
| 122 | inorganics       | thiophenol                    | 108-98-5              | C <sub>6</sub> H <sub>6</sub> S                                | mg/Nm <sup>3</sup> | UNI CEN/TS 13649                 | 0.1   |
| 123 |                  | nitrogen                      | 7727-37-9             | N <sub>2</sub>                                                 | mg/Nm <sup>3</sup> | UNI CEN/TS 13649                 | 0.1   |
| 124 |                  | hydrogen chloride             | 7647-01-0             | HCl                                                            | mg/Nm <sup>3</sup> | Ministerial Decree<br>2000/08/25 | 0.001 |
| 125 |                  | hydrogen fluoride             | 7664-39-3             | HF                                                             | mg/Nm <sup>3</sup> | Ministerial Decree<br>2000/08/25 | 0.001 |
| 126 |                  | ammonia                       | 7664-41-7             | NH <sub>3</sub>                                                | mg/Nm <sup>3</sup> | UNICHIM 632                      | 0.01  |

\* Sum of isomers. <sup>a</sup> Limit of quantification.

Analytical instrumentation:

- # 1 – 4: stationary biogas analyzer, SWG 100 – MRU.
- # 5 – 103: portable micro GC-MS, micro-GC Fusion – Inficon
- # 104 – 105: ion chromatograph, 930 Compact IC Flex - Metrohm
- # 106: UV-VIS spectrophotometer, V-630 - Jasco

**Table S2:** bio-CH<sub>4</sub> specification

| trace compounds concentration in bio-CH <sub>4</sub> exiting the upgrading unit and injected in the natural gas grid |                  |                    |                               |                  |                                |                   |
|----------------------------------------------------------------------------------------------------------------------|------------------|--------------------|-------------------------------|------------------|--------------------------------|-------------------|
| trace compound                                                                                                       | formula          | unit               | method                        | LOQ <sup>a</sup> | content in bio-CH <sub>4</sub> | legislation limit |
| hydrogen                                                                                                             | H <sub>2</sub>   | %                  | UNI EN ISO 6974               | 0.0001           | ≤ LOQ                          | ≤ 0.5             |
| oxygen                                                                                                               | O <sub>2</sub>   | %                  | UNI EN ISO 6974               | 0.0001           | 0.0330                         | ≤ 0.6             |
| nitrogen                                                                                                             | N <sub>2</sub>   | %                  | UNI EN ISO 6974               | 0.0001           | 0.2550                         | not provided      |
| carbon oxide                                                                                                         | CO               | %                  | UNI EN ISO 6974               | 0.0001           | 0.0021                         | ≤ 0.1             |
| carbon dioxide                                                                                                       | CO <sub>2</sub>  | %                  | UNI EN ISO 6974               | 0.0001           | 1.6620                         | ≤ 2.5             |
| hydrogen sulfide                                                                                                     | H <sub>2</sub> S | mg/Sm <sup>3</sup> | UNI EN ISO 6974               | 0.0001           | 0.0075                         | ≤ 5               |
| total sulfur                                                                                                         | S                | mg/Sm <sup>3</sup> | UNI EN ISO 19739              | 0.01             | ≤ LOQ                          | ≤ 6               |
| total silicon                                                                                                        | Si               | mg/Sm <sup>3</sup> | UNI CEN/TS 13649              | 0.0001           | 0.0010                         | ≤ 1               |
| ammonia                                                                                                              | NH <sub>3</sub>  | mg/Sm <sup>3</sup> | UNICHIM 632                   | 0.01             | 0.17                           | ≤ 10              |
| total amines                                                                                                         | //               | mg/Sm <sup>3</sup> | NIOSH 2010                    | 0.001            | ≤ LOQ                          | ≤ 10              |
| fluorine                                                                                                             | F <sub>2</sub>   | mg/Sm <sup>3</sup> | Ministerial Decree 2000/08/25 | 0.001            | ≤ LOQ                          | ≤ 3               |
| chlorine                                                                                                             | Cl <sub>2</sub>  | mg/Sm <sup>3</sup> | Ministerial Decree 2000/08/25 | 0.001            | 0.011                          | ≤ 1               |
| water Dew Point at 70 bar                                                                                            | //               | °C                 | UNI EN ISO 6327               | 0.01             | -60.05                         | ≤ -5              |

<sup>a</sup> Limit of quantification
